# Supplementary material
Source: MDPI journal article supplement (https://www.mdpi.com/2072-4292/10/9/1423)

# Dataset available from : <https://goo.gl/ZsgeCV>

Overview of training and testing dataset.

| Description                               | RedEdge-M                                                       | Sequoia                                                         |
|-------------------------------------------|-----------------------------------------------------------------|-----------------------------------------------------------------|
| # Orthomosaic map                         | 5                                                               | 3                                                               |
| Total surveyed area (ha)                  | 0.8934                                                          | 0.762                                                           |
| # channel                                 | 12 <sup>a</sup>                                                 | 8 <sup>b</sup>                                                  |
| Input image size<br>(in pixel, tile size) | 480 × 360                                                       |                                                                 |
| # training data                           | # images= 403 × 12 = 4836 <sup>c</sup><br># pixel = 835,660,800 | # images = 404 × 8 <sup>b</sup> = 3232<br># pixel = 558,489,600 |
| # testing data                            | 94 × 12 = 1128<br># pixel = 194,918,400                         | 125 × 8 = 1000<br># pixel = 172,800,000                         |
| Total data                                | # image = 10,196, # pixel = 1,761,868,800                       |                                                                 |
| Altitude                                  | 10 m                                                            |                                                                 |

<sup>a</sup> 12 channels of RedEdge-M data consists of R(1), Red edge(1), G(1), B(1), RGB(3), CIR(3), NDVI(1), and NIR(1). The number in parentheses indicate the number of channel; <sup>b</sup> 8 channels Sequoia data consists of R(1), Red edge(1), G(1), CIR(3), NDVI(1), and NIR(1); <sup>c</sup> Each channel is treated as an image.

# Aerial platforms used for data collection

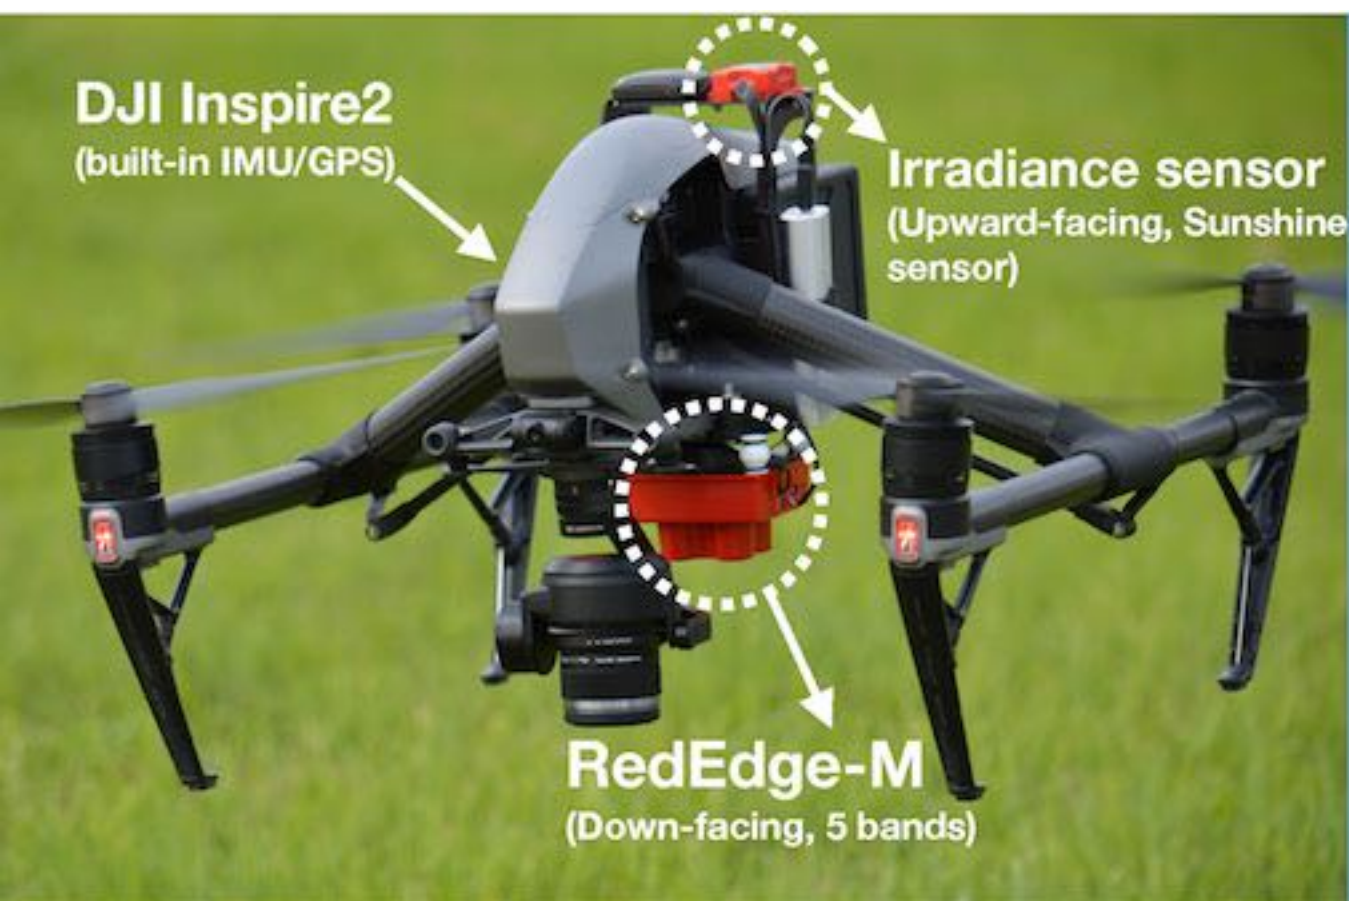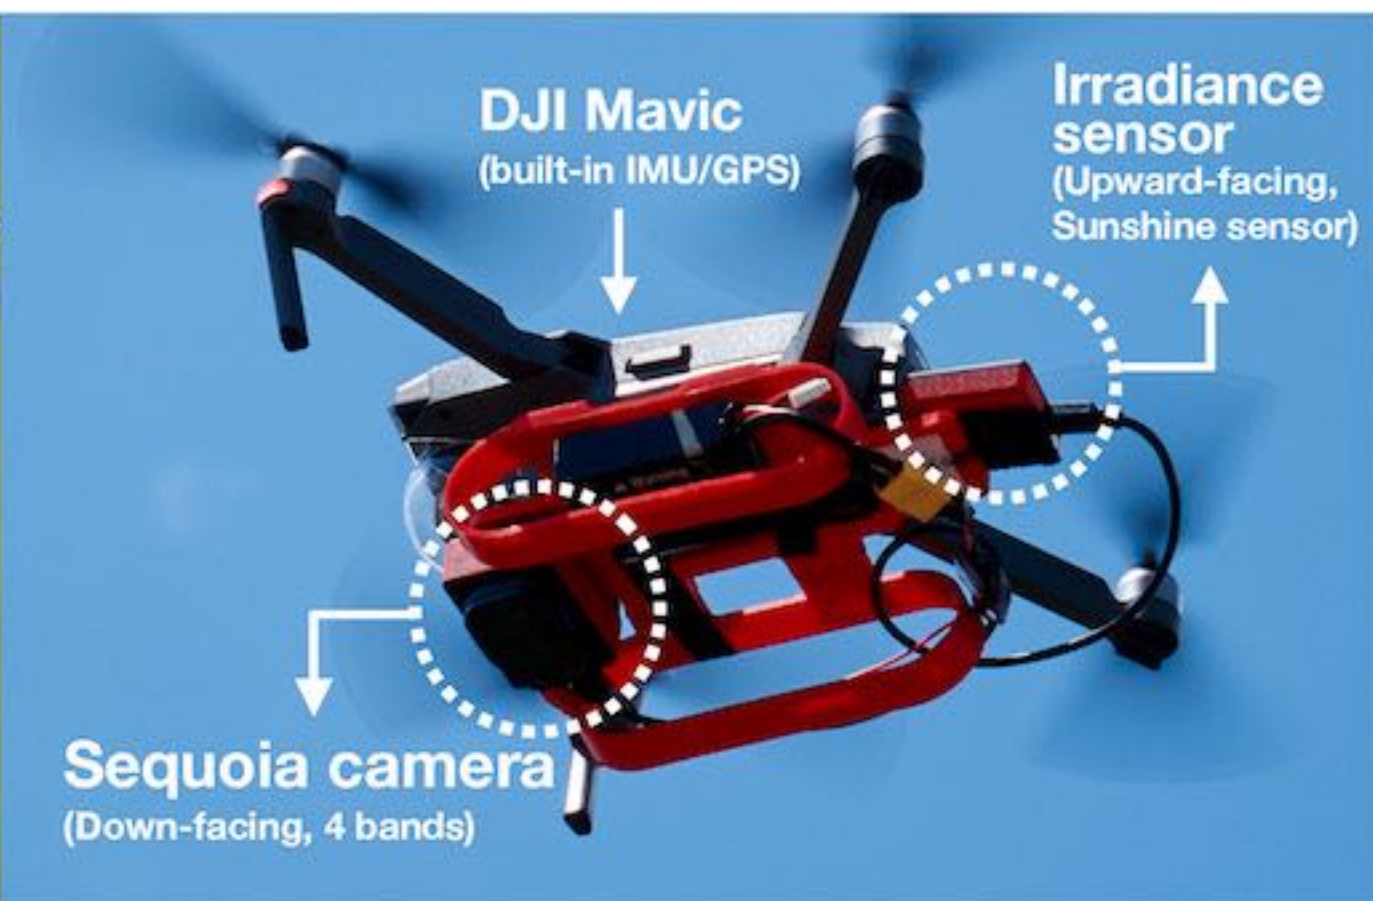

# Multispectral orthomosaic images with expert guided label dataset

RGB composite image

840nm NIR image

Ground truth image

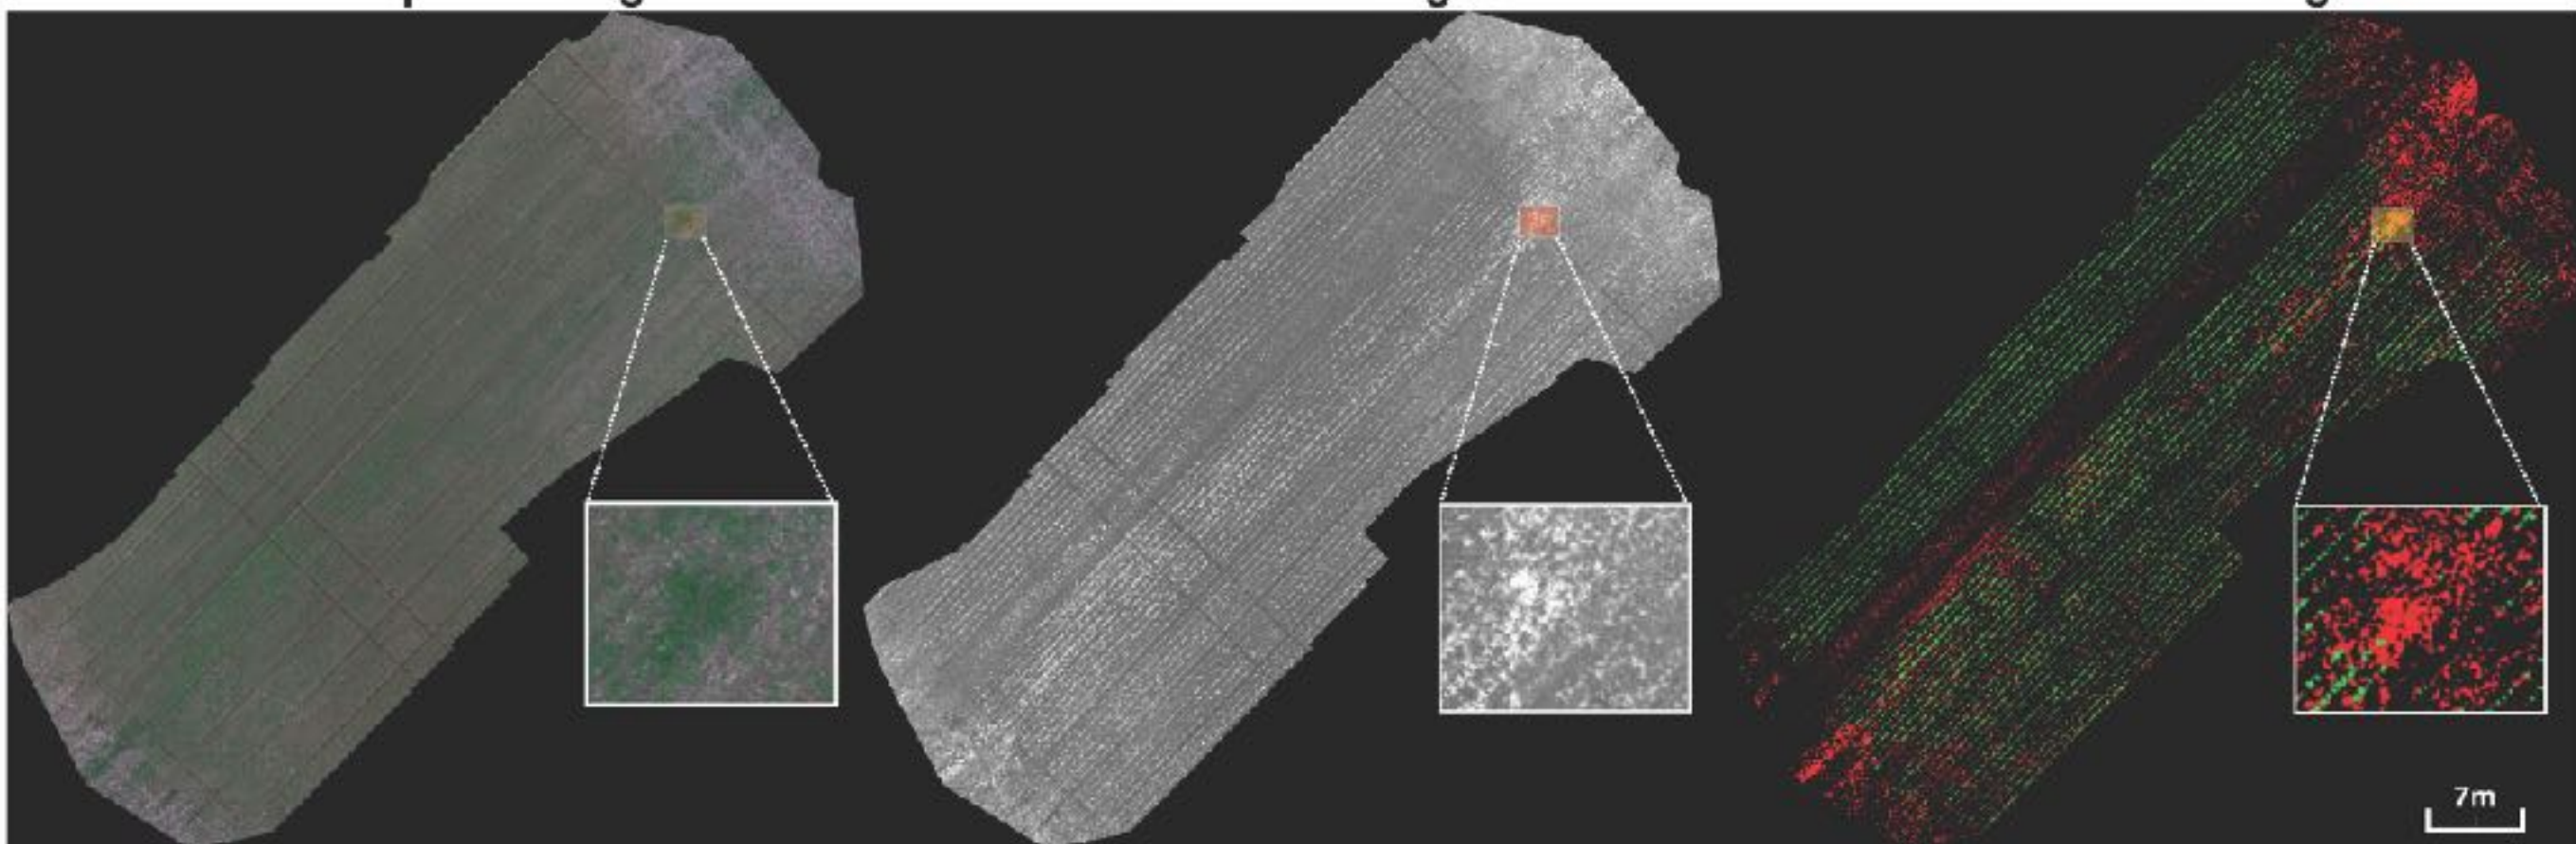

Width x Height=5995x5854 pixel, GSD = 0.94cm/pixel, area=65x35m, 2,275m<sup>2</sup> (0.22ha)



# High-fidelity orthomosaic images

**RGB composite image**

(1085x1085 pixels)

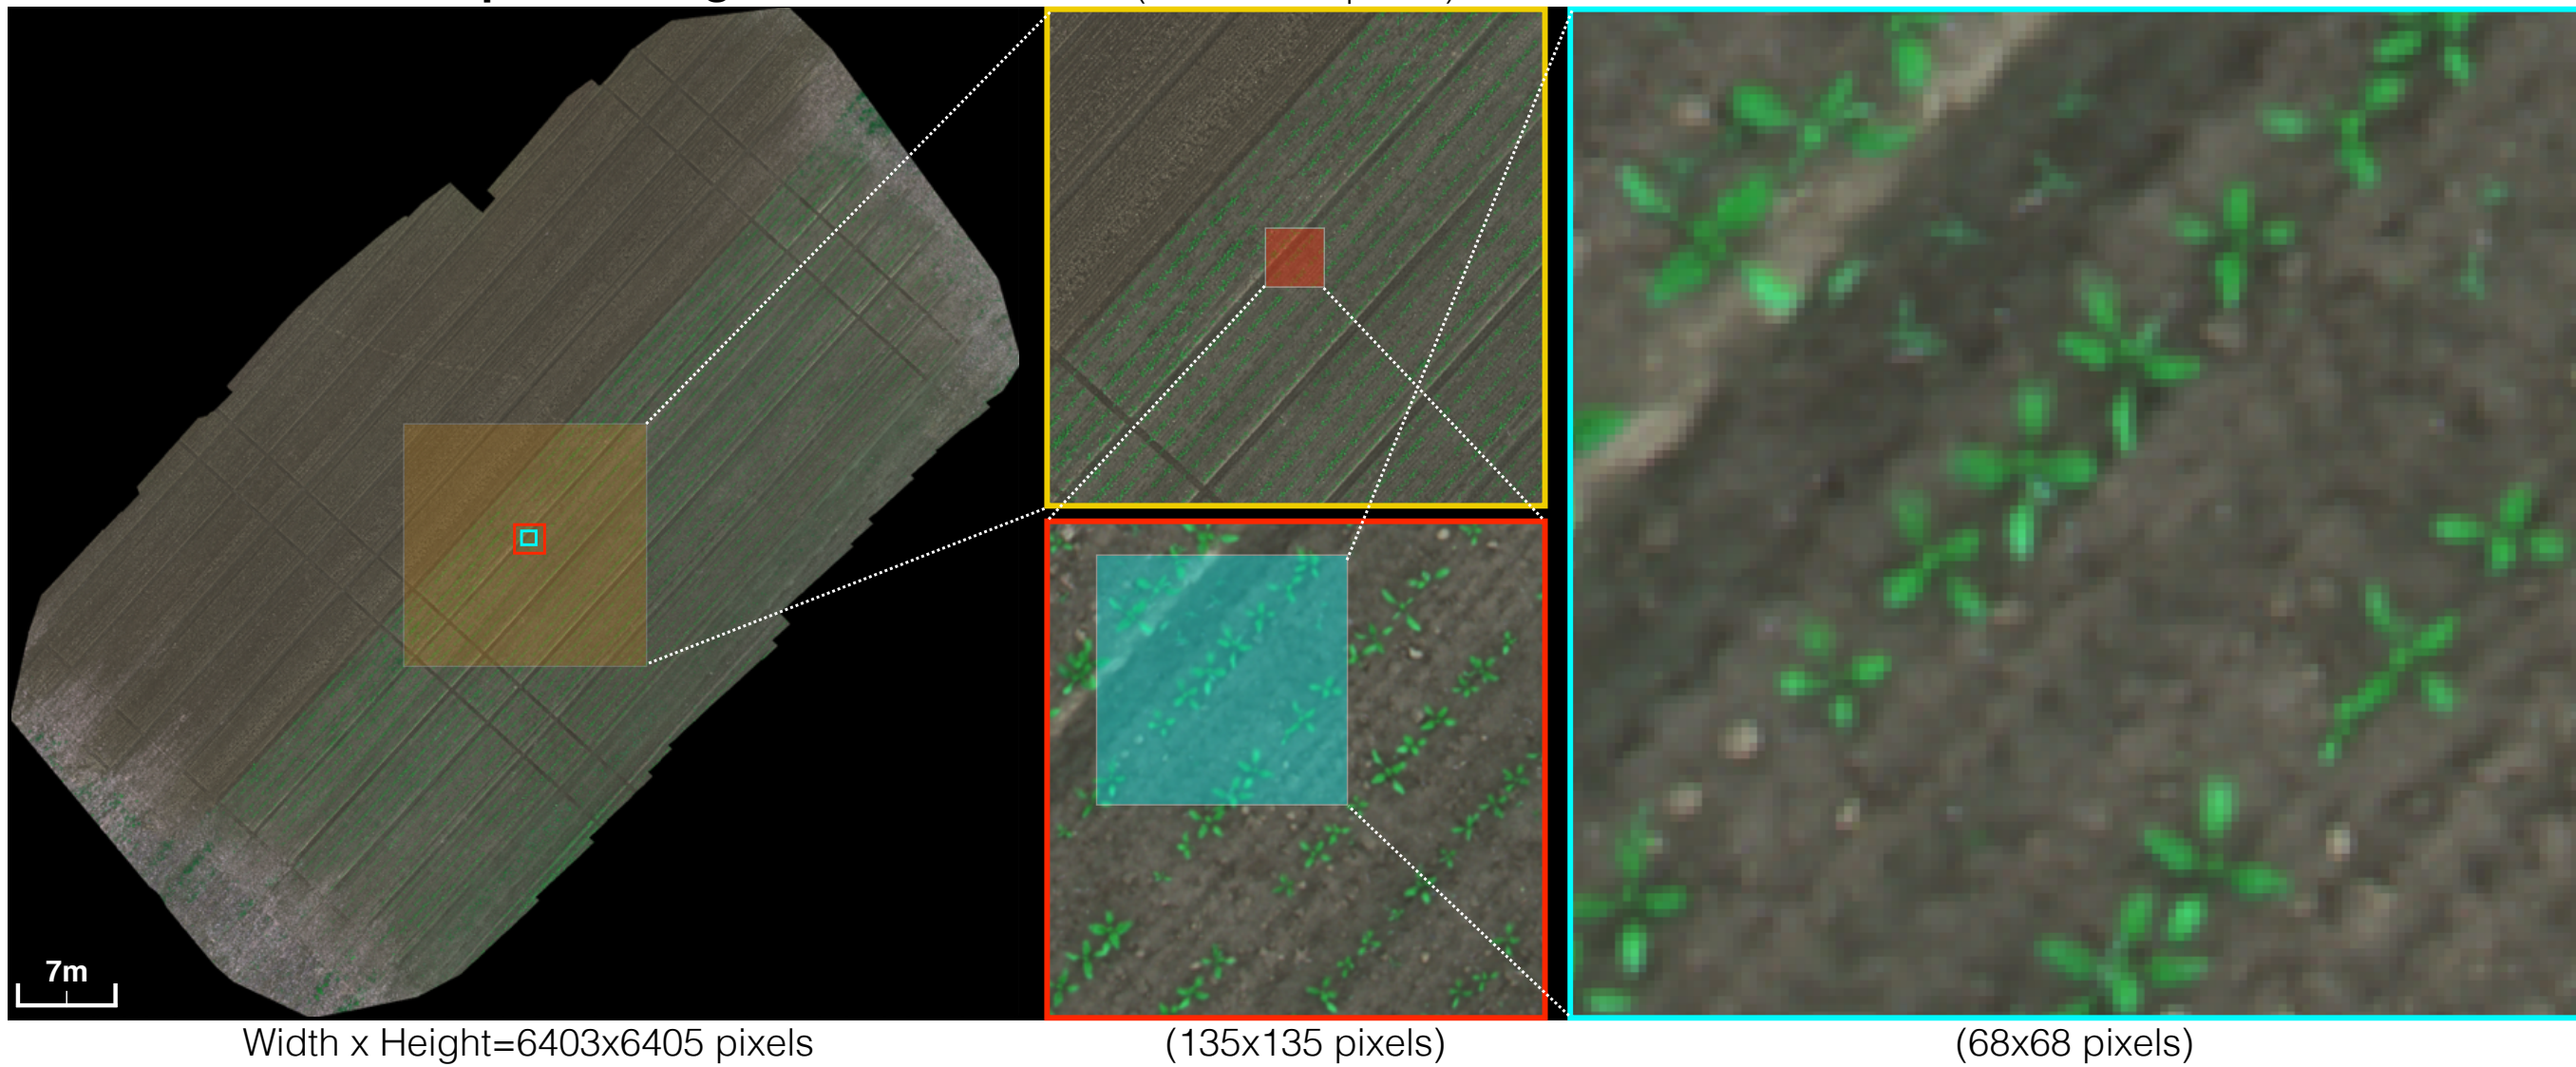

# WeedMap pipeline

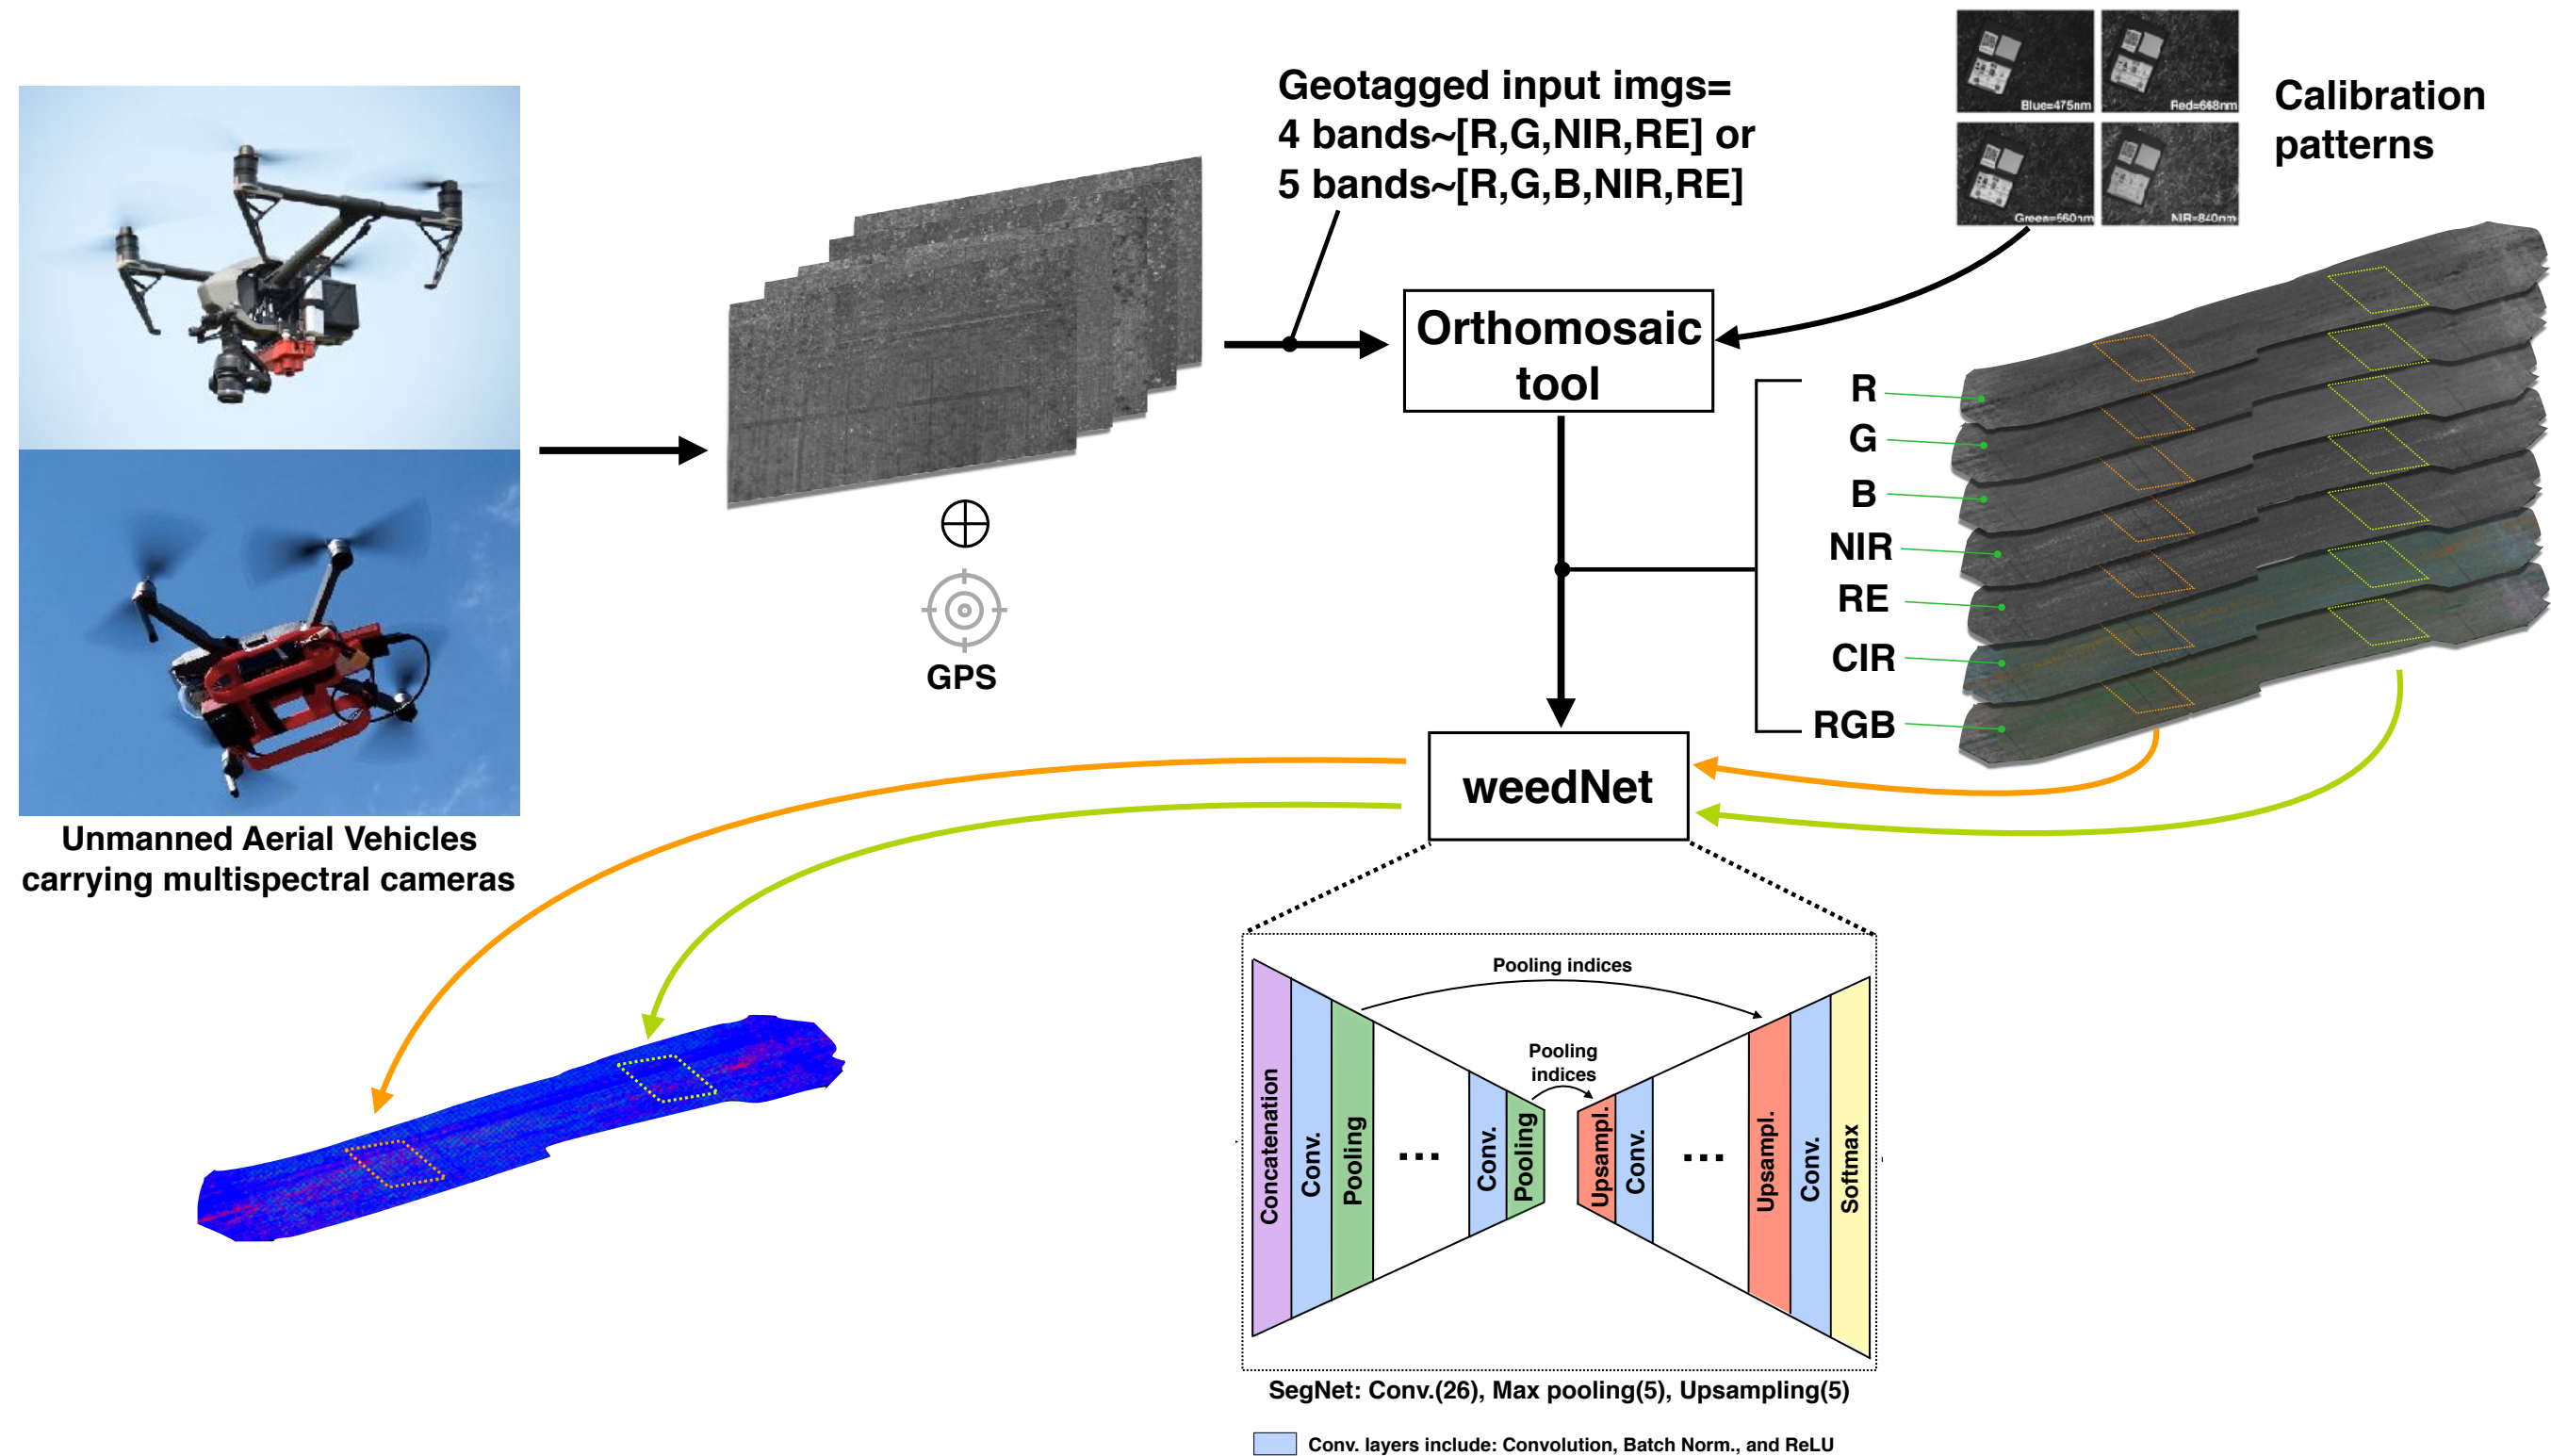

Supplement: s1 [file s1]
